# Supplementary material for: Causal Association between Periodontitis and Parkinson’s Disease: A Bidirectional Mendelian Randomization Study
Source: MDPI journal article supplement (doi:10.3390/genes12050772), 2021-05-19
Supplement: s1 [file s1]

**Table S2.** Summary statistics for MR analysis of potential causal effect of Parkinson's disease on periodontitis

| SNP         | Chr | Nearest gene | Alleles: effect*/other | Eaf   | Exposure: PD<br>(20,184 cases and 397,324 controls) |        |          | Outcome: periodontitis<br>(975 adult participants) [2] |           |        |
|-------------|-----|--------------|------------------------|-------|-----------------------------------------------------|--------|----------|--------------------------------------------------------|-----------|--------|
|             |     |              |                        |       | Coefficient <sup>#</sup>                            | SE     | Pvalue   | Coefficient <sup>#</sup>                               | SE        | Pvalue |
| rs10463554  | 5   | PAM          | T / C                  | NA    | 0,0629                                              | 0,0120 | 2,00E-07 | 0,0000                                                 | 5.89e-05  | 0.43   |
| rs10797576  | 1   | SIPA1L2      | T / C                  | 0.135 | 0,1133                                              | 0,0137 | 8,00E-13 | -0,0001                                                | 8.41e-05  | 0.09   |
| rs10906923  | 10  | FAM171A1     | A / C                  | 0.694 | 0,0726                                              | 0,0143 | 1,00E-08 | 0,0001                                                 | 5.94e-05  | 0.22   |
| rs11060180  | 12  | OGFOD2       | A / G                  | 0.551 | 0,1054                                              | 0,0114 | 2,00E-20 | 0,0001                                                 | 5.63e-05  | 0.36   |
| rs11158026  | 14  | GCH1         | C / T                  | 0.669 | 0,0943                                              | 0,0093 | 4,00E-16 | -0,0001                                                | 5.87e-05  | 0.29   |
| rs111343    | 16  | COQ7         | T / G                  | 0.454 | 0,0677                                              | 0,0119 | 9,00E-11 | -0,0001                                                | 5.702e-05 | 0.02   |
| rs117896735 | 10  | BAG3         | A / G                  | 0.015 | 0,5008                                              | 0,0569 | 2,00E-19 | 0,0001                                                 | 0.0002    | 0.76   |
| rs12456492  | 18  | SYT4         | G / A                  | 0.315 | 0,0953                                              | 0,0117 | 6,00E-16 | 0,0000                                                 | 5.99e-05  | 0.95   |
| rs12497850  | 3   | NCKIPSD      | T / G                  | 0.653 | 0,0726                                              | 0,0143 | 9,00E-09 | 0,0000                                                 | 5.81e-05  | 0.39   |
| rs12637471  | 3   | MCCC1        | G / A                  | 0.802 | 0,1625                                              | 0,0151 | 2,00E-30 | -0,0002                                                | 7.06e-05  | 0.03   |
| rs13294100  | 9   | SH3GL2       | G / T                  | 0.629 | 0,0834                                              | 0,0140 | 5,00E-13 | 0,0000                                                 | 5.84e-05  | 0.89   |
| rs14235     | 16  | ZNF646       | A / G                  | 0.378 | 0,0770                                              | 0,0094 | 5,00E-12 | 0,0001                                                 | 5.78e-05  | 0.08   |
| rs1474055   | 2   | STK39        | T / C                  | 0.126 | 0,1863                                              | 0,0191 | 6,00E-26 | -0,0001                                                | 8.60e-05  | 0.41   |
| rs17649553  | 17  | ARHGAP27     | C / T                  | 0.779 | 0,2485                                              | 0,0139 | 1,00E-68 | 0,0000                                                 | 6.64e-05  | 0.71   |
| rs199347    | 7   | KLHL7        | A / G                  | 0.588 | 0,0943                                              | 0,0093 | 4,00E-18 | 0,0000                                                 | 5.65e-05  | 0.81   |
| rs2280104   | 8   | SORBS3       | T / C                  | 0.367 | 0,0677                                              | 0,0120 | 3,00E-08 | 0,0000                                                 | 5.81e-05  | 0.46   |
| rs2296887   | 10  | GBF1         | C / T                  | NA    | 0,0807                                              | 0,0142 | 2,00E-07 | 0,0001                                                 | 7.92e-05  | 0.47   |
| rs2414739   | 15  | VPS13C       | A / G                  | 0.734 | 0,0943                                              | 0,0093 | 4,00E-14 | 0,0000                                                 | 6.38e-05  | 0.68   |
| rs2694528   | 5   | ELOVL7       | C / A                  | 0.115 | 0,1398                                              | 0,0199 | 5,00E-15 | -0,0001                                                | 0.0001    | 0.26   |

|                        |    |          |       |       |        |        |          |         |          |      |
|------------------------|----|----------|-------|-------|--------|--------|----------|---------|----------|------|
| rs2740594              | 8  | CTSB     | A / G | 0.753 | 0,0862 | 0,0117 | 6,00E-12 | 0,0000  | 6.33e-05 | 0.94 |
| rs316619               | 15 | LTK      | C / T | NA    | 0,0534 | 0,0121 | 7,00E-06 | 0,0000  | 5.76e-05 | 0.4  |
| rs329648               | 11 | MIR4697  | T / C | 0.351 | 0,0862 | 0,0117 | 1,00E-13 | 0,0000  | 5.85e-05 | 0.54 |
| rs34043159             | 2  | IL1R2    | C / T | 0.352 | 0,0770 | 0,0094 | 5,00E-11 | 0,0000  | 5.85e-05 | 0.69 |
| rs34311866             | 4  | TMEM175  | C / T | 0.184 | 0,2070 | 0,0145 | 1,00E-50 | -0,0001 | 7.30e-05 | 0.05 |
| rs356182               | 4  | SNCA     | G / A | 0.349 | 0,2852 | 0,0115 | 5,00E-13 | -0,0001 | 5.95e-05 | 0.29 |
| rs35749011             | 1  | GBA      | A / G | 0.012 | 0,5447 | 0,0441 | 3,00E-35 | 0,0002  | 0.0002   | 0.36 |
| rs3793947              | 11 | DLG2     | G / A | 0.558 | 0,0726 | 0,0119 | 4,00E-09 | 0,0001  | 5.66e-05 | 0.35 |
| rs4073221              | 3  | SATB1    | G / T | 0.132 | 0,0953 | 0,0163 | 2,00E-08 | 0,0001  | 8.41e-05 | 0.25 |
| rs4653767              | 1  | ITPKB    | T / C | 0.685 | 0,0834 | 0,0118 | 2,00E-11 | -0,0001 | 6.19e-05 | 0.27 |
| rs4784227              | 16 | TOX3     | T / C | 0.265 | 0,0862 | 0,0140 | 1,00E-10 | -0,0001 | 6.49e-05 | 0.44 |
| rs591323               | 8  | MICU3    | G / A | 0.726 | 0,0943 | 0,0140 | 2,00E-11 | 0,0000  | 6.17e-05 | 0.57 |
| rs62120679             | 19 | LSM7     | T / C | 0.31  | 0,0770 | 0,0142 | 7,00E-07 | 0,0000  | 6.14e-05 | 0.49 |
| rs6416935              | 17 | MED13    | G / T | NA    | 0,0780 | 0,0142 | 4,00E-07 | 0,0001  | 7.69e-05 | 0.38 |
| rs6430538              | 2  | TMEM163  | C / T | 0.55  | 0,1165 | 0,0113 | 8,00E-24 | 0,0001  | 5.69e-05 | 0.34 |
| rs67460515             | 3  | SPTSSB   | C / T | NA    | 0,0573 | 0,0096 | 1,00E-06 | -0,0001 | 6.01e-05 | 0.19 |
| rs6812193              | 4  | FAM47E   | C / T | 0.63  | 0,0834 | 0,0118 | 1,00E-14 | -0,0001 | 5.74e-05 | 0.36 |
| rs76904798             | 12 | LRRK2    | T / C | 0.137 | 0,1398 | 0,0155 | 1,00E-19 | 0,0001  | 7.90e-05 | 0.24 |
| rs78738012             | 4  | ANK2     | C / T | 0.106 | 0,1222 | 0,0181 | 5,00E-11 | 0,0000  | 9.28e-05 | 0.66 |
| rs8005172              | 14 | GALC     | T / C | 0.424 | 0,0770 | 0,0119 | 9,00E-11 | -0,0001 | 5.62e-05 | 0.19 |
| rs8118008 <sup>‡</sup> | 20 | DDRKG1   | A / G | 0.609 | 0,0677 | 0,0120 | 2,00E-06 | 0,0000  | 5.72e-05 | 0.64 |
| rs9275326              | 6  | HLA-DRB6 | C / T | 0.895 | 0,1625 | 0,0218 | 1,00E-13 | 0,0000  | 9.19e-05 | 0.88 |

|           |    |        |       |       |        |        |          |         |          |      |
|-----------|----|--------|-------|-------|--------|--------|----------|---------|----------|------|
| rs943437  | 6  | CCN6   | A / G | NA    | 0,0899 | 0,0163 | 6,00E-08 | -0,0001 | 8.42e-05 | 0.39 |
| rs9468199 | 5  | ZNF184 | A / G | 0.172 | 0,1044 | 0,0138 | 1,00E-12 | 0,0000  | 7.37e-05 | 0.71 |
| rs9516970 | 13 | -      | A / G | NA    | 0,0630 | 0,0120 | 5,00E-07 | -0,0001 | 5.93e-05 | 0.07 |
| rs9568188 | 13 | CAB39L | T / C | NA    | 0,0661 | 0,0120 | 4,00E-07 | 0,0000  | 6.27e-05 | 0.61 |

PD: Parkinson's disease; Chr: chromosome; Eaf: effect allele frequency; SE: standard error; SNP: single-nucleotide polymorphism

\*Effect allele carrier has increased risk of PD; #Coefficient: B estimate

These 45 SNPs were used as instrumental variables for PD.

¥ rs8118008 (A/G) was used as proxy SNP (linkage disequilibrium  $R^2 > 0.8$ ).

## References

1. Chang, D.; Nalls, M.A.; Hallgrímsdóttir, I.B.; Hunkapiller, J.; Brug, M. van der; Cai, F.; Kerchner, G.A.; Ayalon, G.; Bingol, B.; Sheng, M.; et al. A meta-analysis of genome-wide association studies identifies 17 new Parkinson's disease risk loci. *Nat. Genet.* **2017**, *49*, 1511–1516.
2. Offenbacher, S.; Divaris, K.; Barros, S.P.; Moss, K.L.; Marchesan, J.T.; Morelli, T.; Zhang, S.; Kim, S.; Sun, L.; Beck, J.D.; et al. Genome-wide association study of biologically informed periodontal complex traits offers novel insights into the genetic basis of periodontal disease. *Hum. Mol. Genet.* **2016**, *25*, 2113–2129.
