# Supplementary material for: Causal Association between Periodontitis and Parkinson’s Disease: A Bidirectional Mendelian Randomization Study
Source: MDPI journal article supplement (doi:10.3390/genes12050772), 2021-05-19
Supplement: s1 [file s1]

**Table S1.** Summary statistics for Mendelian randomization analysis of potential causal effect of periodontitis on Parkinson's disease

| SNP                                                                     | Chr | Nearest genes/contig | Alleles: effect/other | Eaf <sup>†</sup> | Exposure: Periodontitis  |        |                | Outcome: PD<br>(37,688 cases and 1.4 million controls) [1] |        |                |
|-------------------------------------------------------------------------|-----|----------------------|-----------------------|------------------|--------------------------|--------|----------------|------------------------------------------------------------|--------|----------------|
|                                                                         |     |                      |                       |                  | Coefficient <sup>#</sup> | SE     | <i>P</i> value | Coefficient <sup>#</sup>                                   | SE     | <i>P</i> value |
| Teumer <i>et al.</i> [2] (1,817 periodontitis cases vs. 2,215 controls) |     |                      |                       |                  |                          |        |                |                                                            |        |                |
| rs111571364                                                             | 2   | GPN1                 | T / G                 | 0.02             | 1.24                     | 0.2777 | 8.00E-06       | 0.0002                                                     | 0.0015 | 0.89           |
| rs12048046                                                              | 1   | ACTN2                | T / C                 | 0.90             | 0.42                     | 0.0884 | 3.00E-06       | 0.0004                                                     | 0.0006 | 0.50           |
| rs12587630                                                              | 14  | FOXA1                | A / G                 | 0.98             | 0.99                     | 0.2203 | 7.00E-06       | -0.0013                                                    | 0.0011 | 0.22           |
| rs13237474                                                              | 7   | FAM180A              | T / C                 | 0.03             | 1.12                     | 0.2152 | 2.00E-07       | -0.0018                                                    | 0.0011 | 0.10           |
| rs1953021                                                               | 9   | C9orf150             | T / G                 | 0.71             | 0.30                     | 0.0620 | 1.00E-06       | -0.0004                                                    | 0.0004 | 0.33           |
| rs2009196                                                               | 17  | TIMP2                | C / G                 | 0.23             | 0.34                     | 0.0723 | 2.00E-06       | 0.0001                                                     | 0.0004 | 0.77           |
| rs263063                                                                | 19  | JMJD2B               | T / C                 | 0.08             | 0.49                     | 0.1073 | 6.00E-06       | -0.0004                                                    | 0.0006 | 0.51           |
| rs28455997                                                              | 8   | CSMD1                | T / C                 | 0.84             | 0.39                     | 0.0838 | 3.00E-06       | 0.0001                                                     | 0.0005 | 0.83           |
| rs28643277 <sup>‡</sup>                                                 | 10  | ITGA8                | A / C                 | 0.35             | 0.28                     | 0.0634 | 9.00E-06       | -0.0001                                                    | 0.0004 | 0.70           |
| rs3128935                                                               | 6   | HLA-DOA              | T / C                 | 0.97             | 0.82                     | 0.1847 | 9.00E-06       | -0.0015                                                    | 0.0010 | 0.15           |
| rs6497031                                                               | 15  | RGMA                 | G / A                 | 0.83             | -0.61                    | 0.1346 | 5.00E-06       | 0.0003                                                     | 0.0005 | 0.56           |
| rs6890783                                                               | 5   | ERGIC1               | A / G                 | 0.01             | 1.86                     | 0.4093 | 5.00E-06       | -0.0002                                                    | 0.0016 | 0.89           |
| rs72899866                                                              | 2   | LRP1B                | A / T                 | 0.22             | 0.33                     | 0.0713 | 5.00E-06       | 0.0002                                                     | 0.0004 | 0.58           |
| rs73389468                                                              | 10  | C10orf91             | C / T                 | 0.98             | 1.02                     | 0.2323 | 9.00E-06       | 0.0015                                                     | 0.0014 | 0.29           |

|                                                                       |    |                       |       |       |       |          |          |         |         |      |
|-----------------------------------------------------------------------|----|-----------------------|-------|-------|-------|----------|----------|---------|---------|------|
| rs7819988                                                             | 8  | SNTB1                 | T / C | 0.55  | 0.28  | 0.0600   | 3.00E-06 | 0.0003  | 0.0004  | 0.37 |
| rs78411303                                                            | 3  | PARP15                | A / G | 0.094 | 0.67  | 0.1415   | 3.00E-06 | -0.0008 | 0.0007  | 0.27 |
| rs78797168                                                            | 6  | IGF2R                 | A / G | 0.93  | 0.56  | 0.1194   | 2.00E-06 | 0.0004  | 0.0007  | 0.52 |
| Munz <i>et al.</i> [3] (4,924 periodontitis cases vs. 7,301 controls) |    |                       |       |       |       |          |          |         |         |      |
| rs11084095                                                            | 19 | SIGLEC5, AC018755.2   | G / A | 0.59  | -1.17 | 0.030612 | 5,00E-08 | -0.0003 | 0.00036 | 0.38 |
| rs3780866                                                             | 10 | NUDT5                 | G / A | 0.89  | 1.17  | 0.040816 | 8,00E-06 | -0.0001 | 0.00042 | 0.83 |
| rs6725179                                                             | 21 | RNU6-675P, TEX51      | G / A | 0.66  | -1.15 | 0.035714 | 3,00E-06 | -0.0003 | 0.00037 | 0.38 |
| rs7031401                                                             | -  | LINC01239, AL391117.1 | A / G | 0.92  | -1.27 | 0.061224 | 6,00E-06 | -0.0003 | 0.00065 | 0.60 |
| rs729876                                                              | 16 | U91319.1              | T / C | 0.80  | 1.23  | 0.040816 | 1,00E-08 | 0.0000  | 0.00044 | 0.94 |
| rs886431                                                              | 12 | AC004241.1            | G / A | 0.09  | 1.19  | 0.045918 | 4,00E-06 | -0.0005 | 0.00047 | 0.26 |
| rs9982623                                                             | 21 | MCM3AP                | C / T | 0.86  | 1.23  | 0.05102  | 9,00E-07 | -0.0002 | 0.00053 | 0.70 |
| rs9992954                                                             | 4  | MIR297, LYPLA1P2      | C / T | 0.84  | -1.18 | 0.040816 | 9,00E-06 | 0.0005  | 0.00046 | 0.31 |

PD: Parkinson's disease; Chr: chromosome; Eaf: effect allele frequency; SE: standard error; SNP: single-nucleotide polymorphism

Seventeen/eight SNPs in two GWAS were used as instrumental variables for chronic periodontitis respectively.

‡rs28643277 (A / C) was used as proxy SNP (linkage disequilibrium  $R^2 > 0.8$ ).

## References

1. Nalls, M.A.; Blauwendraat, C.; Vallerga, C.L.; Heilbron, K.; Bandres-Ciga, S.; Chang, D.; Tan, M.; Kia, D.A.; Noyce, A.J.; Xue, A.; et al. Identification of novel risk loci, causal insights, and heritable risk for Parkinson's disease: a meta-analysis of genome-wide association studies. *Lancet Neurol.* **2019**, *18*, 1091–1102.
2. Teumer, A.; Holtfreter, B.; Völker, U.; Petersmann, A.; Nauck, M.; Biffar, R.; Völzke, H.; Kroemer, H.K.; Meisel, P.; Homuth, G.; et al. Genome-

wide association study of chronic periodontitis in a general German population. *J. Clin. Periodontol.* **2013**, *40*, 977–985.

3. Munz, M.; Richter, G.M.; Loos, B.G.; Jepsen, S.; Divaris, K.; Offenbacher, S.; Teumer, A.; Holtfreter, B.; Kocher, T.; Bruckmann, C.; et al. Meta-analysis of genome-wide association studies of aggressive and chronic periodontitis identifies two novel risk loci. *Eur. J. Hum. Genet.* **2019**, *27*, 102–113.
