# Supplementary figures and images for: Causal Association between Periodontitis and Parkinson’s Disease: A Bidirectional Mendelian Randomization Study
Source: MDPI journal article supplement (doi:10.3390/genes12050772), 2021-05-19

Supplementary File S3. Leave-one-out meta-analysis for (A) Munz et al., (B) Teumer et al. and (C) Chang et al.

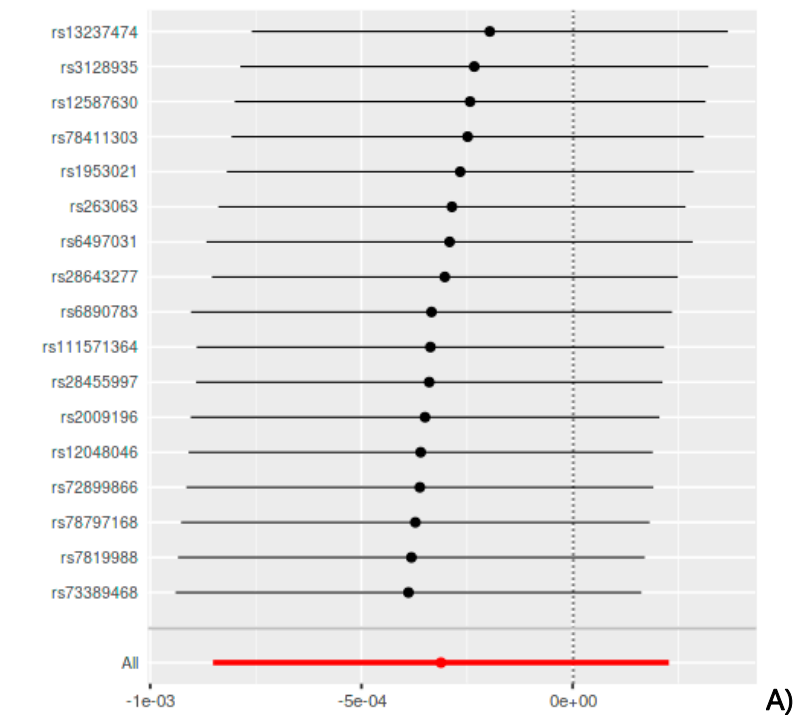

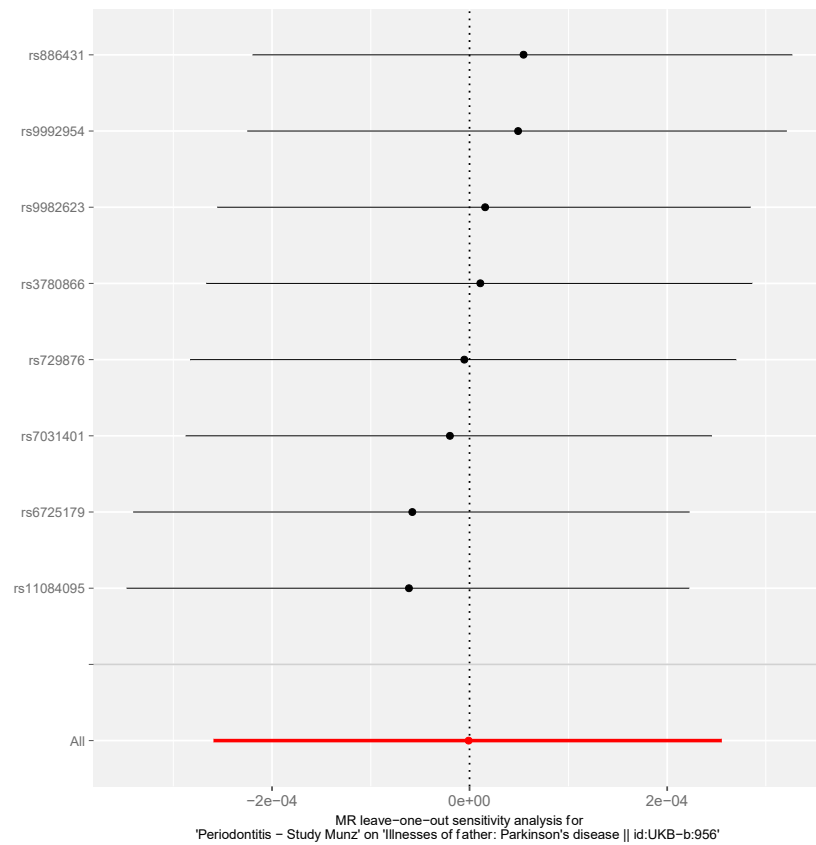

B)

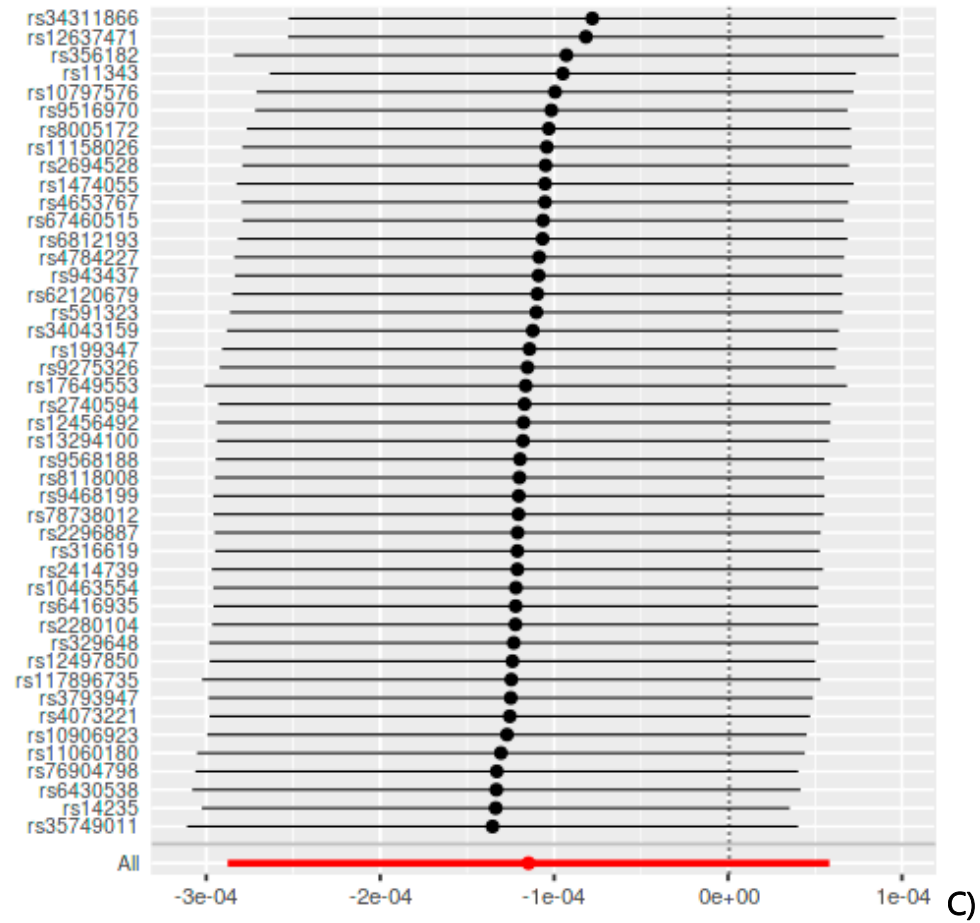

Supplement: s1 [file s1]
